# Supplementary material for: The Platelet Lipidome Is Altered in Patients with COVID-19 and Correlates with Platelet Reactivity
Source: PubMed Central journal article supplement — Thromb Haemost. 2022 Jul 18;122(10):1683–92. doi: 10.1055/s-0042-1749438 (PMC9512584; doi:10.1055/s-0042-1749438), 2022-07-18
Supplement: 10-1055-s-0042-1749438-s210718-1.pdf [file 10-1055-s-0042-1749438-s210718-1.pdf]

**Supplemental methods**

Annotation of ether lipid species, and more specifically the differentiation of PE-o/PC-o from PE-p/PC-p species, was performed based on stable (relative) retention time differences between corresponding o- and p-species. The PC-o and PE-o species elute later on the reversed phase column than the corresponding PC-p and PE-p species, as can be seen in Supplemental Figure 1 which depicts the data analysed in this study. This very reproducible phenomenon was corroborated using a PEDS1 mice model where the enzyme that converts o-species into p-species is deficient. In PEDS1 p-species are not detectable whereas o-species accumulate (unpublished data) confirming the correct annotation of o- and p-species.
