# Supplementary material for: The Platelet Lipidome Is Altered in Patients with COVID-19 and Correlates with Platelet Reactivity
Source: PubMed Central journal article supplement — Thromb Haemost. 2022 Jul 18;122(10):1683–92. doi: 10.1055/s-0042-1749438 (PMC9512584; doi:10.1055/s-0042-1749438), 2022-07-18
Supplement: 10-1055-s-0042-1749438-s210718-3.pdf [file 10-1055-s-0042-1749438-s210718-3.pdf]

**Supplemental Table 2**

| <b>ID</b>  | <b>Common name</b>                        | <b>Abbr.</b> | <b>Synonyms</b>                       | <b>Category</b> | <b>Main class</b>                            |
|------------|-------------------------------------------|--------------|---------------------------------------|-----------------|----------------------------------------------|
| 1-acyl LPC | 2-Lysophosphatidylcholine                 | LysoPC       | LPC                                   | [GP]            | Glycerophosphocholines [GP01]                |
| 1-acyl LPE | 2-Lysophosphatidylethanolamine            | LysoPE       | LPE                                   | [GP]            | Glycerophosphoethanolamines [GP02]           |
| 2-acyl LPC | 1-Lysophosphatidylcholine                 | LysoPC       | LPC                                   | [GP]            | Glycerophosphocholines [GP01]                |
| 2-acyl LPE | 1-Lysophosphatidylethanolamine            | LysoPE       | LPE                                   | [GP]            | Glycerophosphoethanolamines [GP02]           |
| BMP        | Lysobisphosphatidic acid                  | LBPA         | BMP,<br>bis(monoacylglycero)phosphate | [GP]            | Glycerophosphoglycerols [GP04]               |
| CE         | Cholesteryl ester                         | CE           |                                       | [ST]            | Sterols [ST01]                               |
| Cer[d]     | Ceramide                                  | Cer[d]       |                                       | [SP]            | Ceramides [SP02]                             |
| CL         | Cardiolipin                               | CL           |                                       | [GP]            | Glycerophosphoglycerophosphoglycerols [GP12] |
| DG         | Diacylglycerol                            | DG           | DAG                                   | [GL]            | Diacylglycerols [GL02]                       |
| DG-o       | Alkylacylglycerol                         | DG-o         |                                       | [GL]            | Diacylglycerols [GL02]                       |
| DG-p       | Alkenylacylglycerol                       | DG-p         |                                       | [GL]            | Diacylglycerols [GL02]                       |
| Hex2Cer[d] | Dihexosylceramide                         | Hex2Cer      | Glc2Cer; Gal2Cer; LacCer              | [SP]            | Neutral glycosphingolipids [SP05]            |
| Hex2Cer[t] | Hydroxy-dihexosylceramide                 | Hex2Cer      |                                       | [SP]            | Neutral glycosphingolipids [SP05]            |
| HexCer[d]  | Hexocylceramide                           | HexCer       | GlcCer; GalCer                        | [SP]            | Neutral glycosphingolipids [SP05]            |
| HexCer[t]  | Hydroxy-hexosylceramide                   | HexCer       |                                       | [SP]            | Neutral glycosphingolipids [SP05]            |
| LPA        | Lysophosphatic acid                       | LPA          |                                       | [GP]            | Glycerophosphates [GP10]                     |
| LPC        | Lysophosphatidylcholine                   | LysoPC       | LPC                                   | [GP]            | Glycerophosphocholines [GP01]                |
| LPC-o      | Alkyllysophosphatidylcholine              | LysoPC(O)    |                                       | [GP]            | Glycerophosphocholines [GP01]                |
| LPC-o+p    | Alkyl/alkenyllysophosphatidylcholine      | LysoPC(')    |                                       | [GP]            | Glycerophosphocholines [GP01]                |
| LPC-p      | Alkenyllysophosphatidylcholine            | LysoPC(P)    |                                       | [GP]            | Glycerophosphocholines [GP01]                |
| LPE        | Lysophosphatidylethanolamine              | LysoPE       | LPE                                   | [GP]            | Glycerophosphoethanolamines [GP02]           |
| LPE-o      | Alkyllysophosphatidylethanolamine         | LysoPE(O)    |                                       | [GP]            | Glycerophosphoethanolamines [GP02]           |
| LPE-o+p    | Alkyl/alkenyllysophosphatidylethanolamine | LysoPE(')    |                                       | [GP]            | Glycerophosphoethanolamines [GP02]           |
| LPE-p      | Alkenyllysophosphatidylethanolamine       | LysoPE(P)    |                                       | [GP]            | Glycerophosphoethanolamines [GP02]           |
| LPG        | Lysophosphatidylglycerol                  | LysoPG       | LPG                                   | [GP]            | Glycerophosphoglycerols [GP04]               |
| PA         | Phosphatidic acid                         | PA           |                                       | [GP]            | Glycerophosphates [GP10]                     |
| PC         | Phosphatidylcholine                       | PC           |                                       | [GP]            | Glycerophosphocholines [GP01]                |
| PC-o       | Alkylphosphatidylcholine                  | PC(O)        |                                       | [GP]            | Glycerophosphocholines [GP01]                |
| PC-o+p     | Alkyl/alkenylphosphatidylcholine          | PC(')        |                                       | [GP]            | Glycerophosphocholines [GP01]                |
| PC-p       | Alkenylphosphatidylcholine                | PC(P)        |                                       | [GP]            | Glycerophosphocholines [GP01]                |
| PE         | Phosphatidylethanolamine                  | PE           |                                       | [GP]            | Glycerophosphoethanolamines [GP02]           |
| PE-o       | Alkylphosphatidylethanolamine             | PE(O)        |                                       | [GP]            | Glycerophosphoethanolamines [GP02]           |
| PE-o+p     | Alkyl/alkenylphosphatidylethanolamine     | PE(')        |                                       | [GP]            | Glycerophosphoethanolamines [GP02]           |
| PE-p       | Alkenylphosphatidylethanolamine           | PE(P)        |                                       | [GP]            | Glycerophosphoethanolamines [GP02]           |
| PG         | Phosphatidylglycerols                     | PG           |                                       | [GP]            | Glycerophosphoglycerols [GP04]               |
| PI         | Phosphatidylinositols                     | PI           |                                       | [GP]            | Glycerophosphoinositols [GP06]               |
| PS         | Phosphatidylserine                        | PS           |                                       | [GP]            | Glycerophosphoserines [GP03]                 |
| SM[d]      | Sphingomyelin/Ceramide phosphocholines    | SM[d]        |                                       | [SP]            | Phosphosphingolipids [SP03]                  |
| SM[t]      | Hydroxysphingomyelin                      | SM[t]        |                                       | [SP]            | Phosphosphingolipids [SP03]                  |
| SPH[d]     | Sphingosine, Sphinganine                  | SPH[d]       |                                       | [SP]            | Sphingoid bases [SP01]                       |
| TG         | Triacylglycerols                          | TG           | TAG                                   | [GL]            | Triacylglycerols [GL03]                      |
| TG-o       | Alkyldiacylglycerol                       | TG-o         |                                       | [GL]            | Triacylglycerols [GL03]                      |

Supplemental Table 2: Nomenclature overview of all lipid classes annotated in this study.
