# Supplementary material for: The Platelet Lipidome Is Altered in Patients with COVID-19 and Correlates with Platelet Reactivity
Source: PubMed Central journal article supplement — Thromb Haemost. 2022 Jul 18;122(10):1683–92. doi: 10.1055/s-0042-1749438 (PMC9512584; doi:10.1055/s-0042-1749438), 2022-07-18
Supplement: 10-1055-s-0042-1749438-s210718-5.pdf [file 10-1055-s-0042-1749438-s210718-5.pdf]

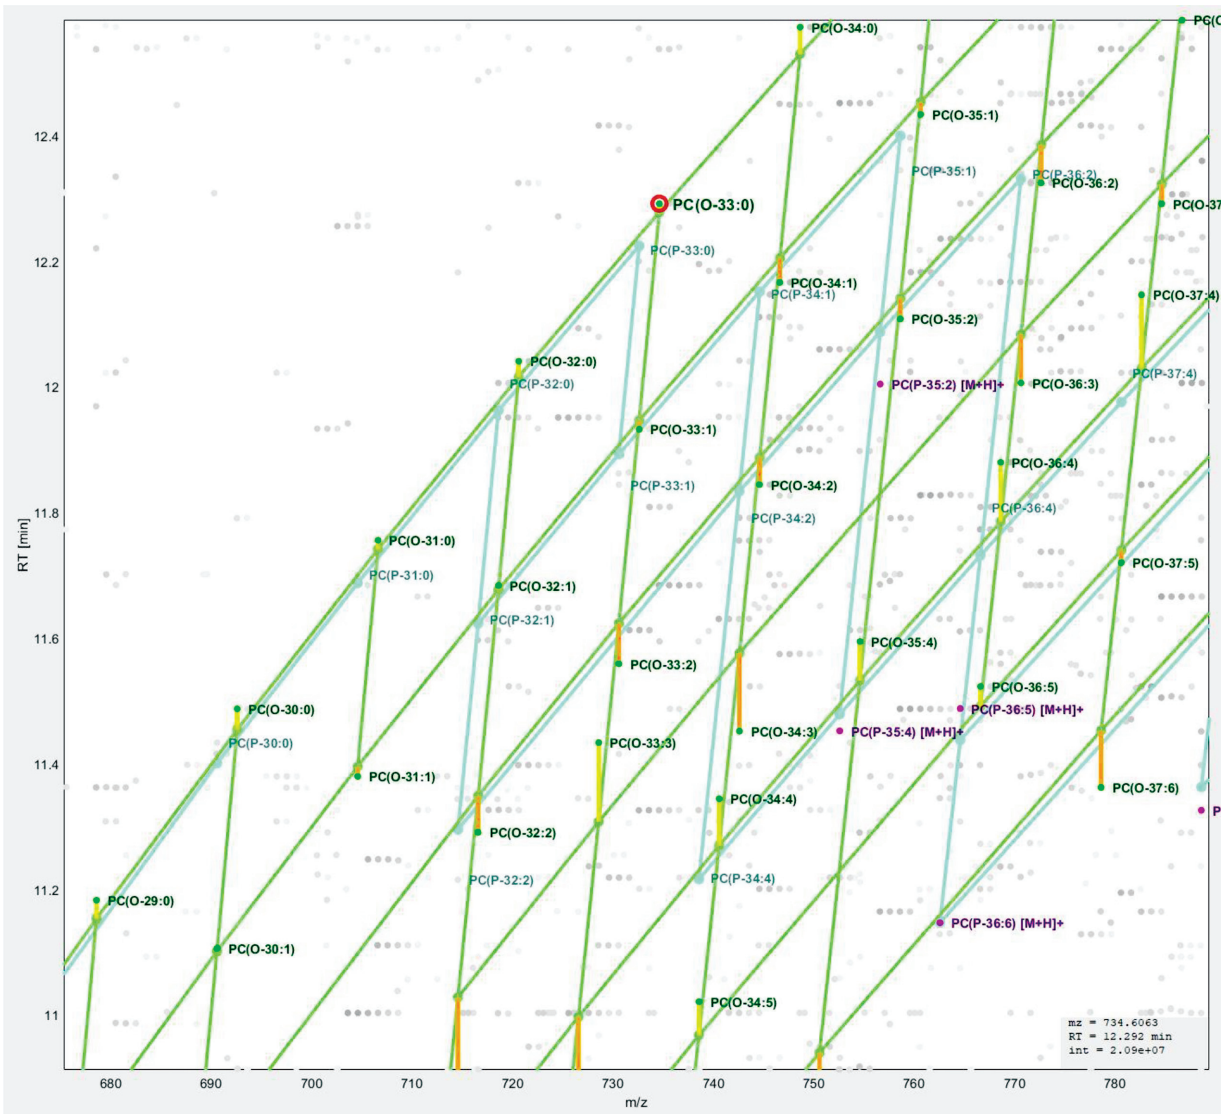

Supplementary Fig. S1 Dot plot showing retention time differences for PC-o/p species in this study. PC, phosphatidylcholine.

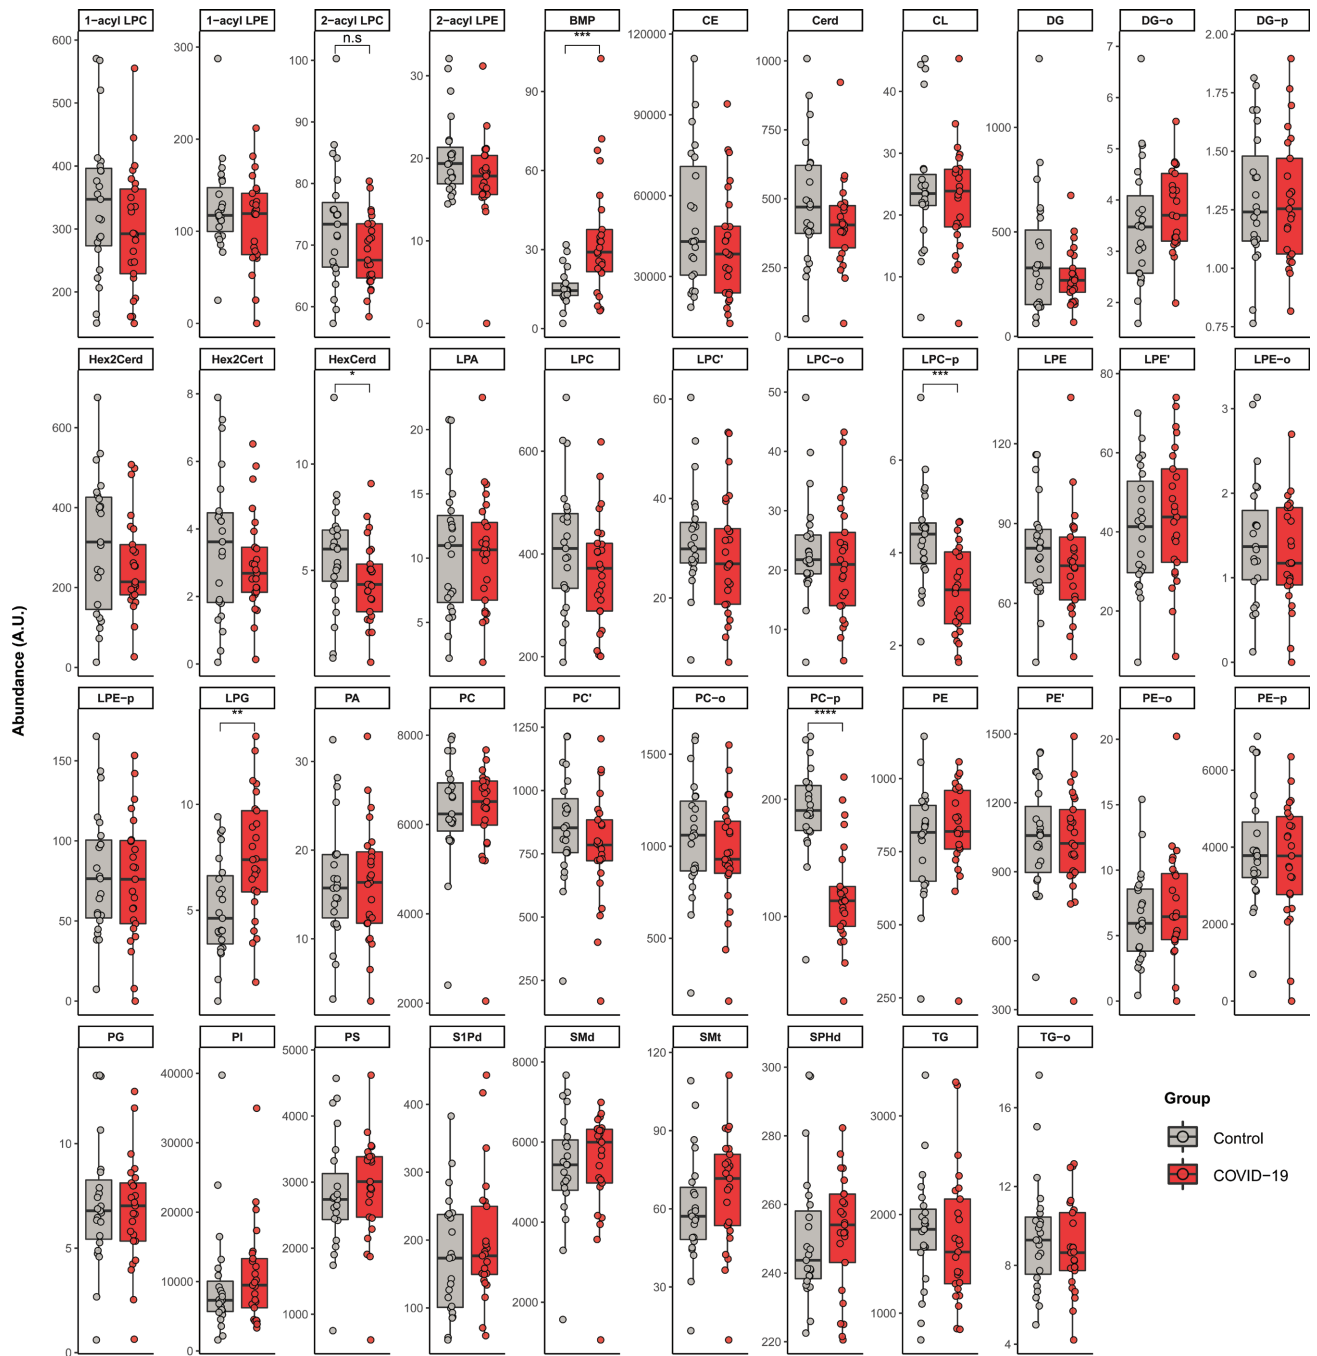

**Supplementary Fig. S2** Boxplots of all investigated lipid classes, comparing patients with COVID-19 to noninfectious controls. Each point shows the aggregated values per lipid class (a sum of all lipids per class per subject), thus each point represents an individual. Values on the y-axis are semiquantitative lipid abundances: the response of analyte divided by that of the internal standard multiplied by the concentration of the internal standard (arbitrary unit, A.U). A  $p$ -value below 0.05 was considered significant after a Wilcoxon-ranked sum test. n.s.  $p$ -value not significant, \* $p$ -value < 0.05, \*\* $p$ -value < 0.01, \*\*\* $p$ -value < 0.001, \*\*\*\* $p$ -value < 0.0001.
